# Supplementary material
Source: PubMed Central journal article supplement (PMC3751273)
Supplement: Supp_Figure1.pdf [file Supp_Figure1.pdf]

## Supplementary Data

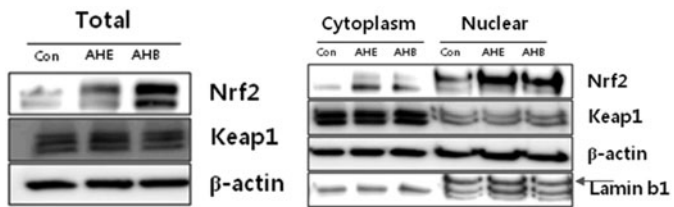

**SUPPLEMENTARY FIG. S1.** Expression of Keap1 level in both cytoplasm and nucleus of HCT116 cells on 100  $\mu\text{g}/\text{mL}$  of AHE and AHB treatment for 4 h.
